# Supplementary material for: A Comparative Study on the Growth Performance and Gut Microbial Composition of Duroc and Yorkshire Boars
Source: MDPI journal article supplement (doi:10.3390/genes14091726), 2023-08-29
Supplement: s1 [file s1]

Supplementary Table S1. The composition and nutrient levels of the basal diet.

| Feed ingredient            | Nutrient levels  | Content (%) |
|----------------------------|------------------|-------------|
| Corn                       | Crude protein    | 12.5        |
| Wheat                      | Crude fiber      | ≤8.0        |
| Soybean meal               | Crude ash        | ≤8.0        |
| Soybean oil                | Calcium          | 0.4-1.2     |
| Wheat flour                | Total phosphorus | ≥0.35       |
| Stone powder               | Chloride         | 0.3-1.0     |
| Calcium hydrogen phosphate | Moisture         | ≤14.0       |
| Sodium chloride            | Lysine           | 0.6         |
| Amino acids                |                  |             |
| Vitamins (A, D, and E)     |                  |             |
| Phytase                    |                  |             |
