# Supplementary figures and images for: A Comparative Study on the Growth Performance and Gut Microbial Composition of Duroc and Yorkshire Boars
Source: MDPI journal article supplement (doi:10.3390/genes14091726), 2023-08-29

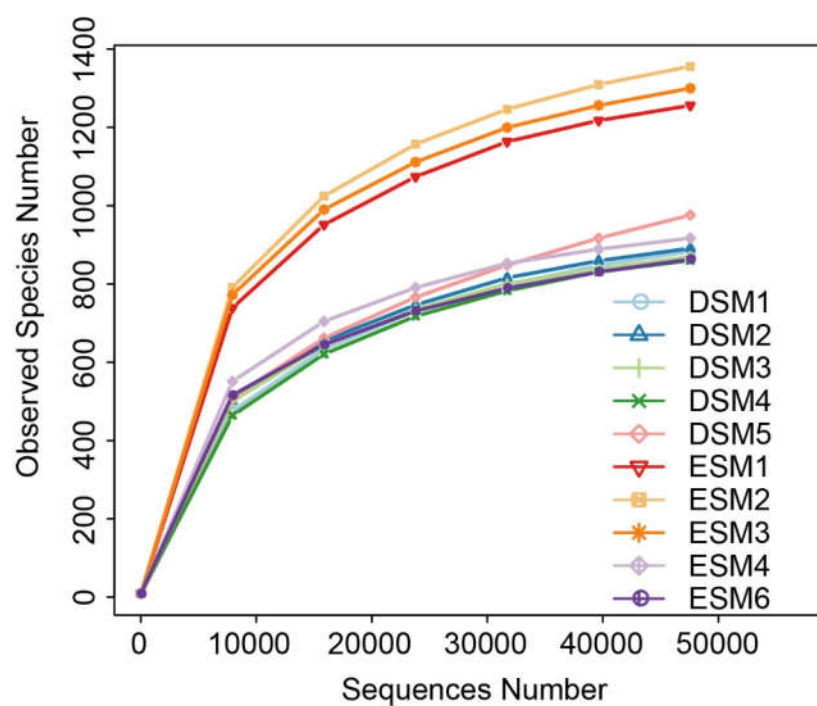

Supplementary Figure S1. The dilution curve of all samples.

Supplement: s1 [file s1]
